# Supplementary material for: Asymptomatic Hyperuricemia Promotes Recovery from Ischemic Organ Injury by Modulating the Phenotype of Macrophages
Source: MDPI journal article supplement (doi:10.3390/cells11040626), 2022-02-11
Supplement: s1 [file s1]

# Asymptomatic Hyperuricemia Promotes Recovery from Ischemic Organ Injury by Modulating the Phenotype of Macrophages

Viviane Gnemmi <sup>1,2</sup>, Qiubo Li <sup>2</sup>, Qiuyue Ma <sup>2</sup>, Letizia De Chiara <sup>3</sup>, Giulia Carangelo <sup>3</sup>, Chenyu Li <sup>2</sup>, Mireia Molina-Van den Bosch <sup>2</sup>, Paola Romagnani <sup>3</sup>, Hans-Joachim Anders <sup>2</sup> and Stefanie Steiger <sup>2,\*</sup>

<sup>1</sup> Service d'Anatomie Pathologique, Centre de Biologie Pathologique, CHU Lille, 59037 Lille, France; viviane.gnemmi@univ-lille.fr

<sup>2</sup> Division of Nephrology, Department of Medicine IV, University Hospital, Ludwig-Maximilians-University Munich, 80336 Munich, Germany; qiubo.li@med.uni-muenchen.de (Q.L.); maqiuyue2014@hotmail.com (Q.M.); chenyu.li@med.uni-muenchen.de (C.L.); mireiamoli@gmail.com (M.M.-V.d.B.); hans-joachim.anders@med.uni-muenchen.de (H.-J.A.)

<sup>3</sup> Department of Experimental and Clinical Biomedical Sciences "Mario Serio", University of Florence, 50139 Florence, Italy; letizia.dechiara@unifi.it (L.D.C.); giulia.carangelo@unifi.it (G.C.); paola.romagnani@unifi.it (P.R.)

\* Correspondence: stefanie.steiger@med.uni-muenchen.de

## Table of content

|                                   |   |
|-----------------------------------|---|
| 1. Supplementary Tables .....     | 2 |
| 1.1 Supplementary Table S1 .....  | 2 |
| 2. Supplementary Figures .....    | 3 |
| 2.1 Supplementary Figure S1 ..... | 3 |
| 2.2 Supplementary Figure S2 ..... | 4 |
| 2.3 Supplementary Figure S3 ..... | 5 |
| 2.4 Supplementary Figure S4 ..... | 6 |

**Supplementary Table S1.** Mouse primer sequences.

| Gene name              | Primer Sequences                                                   |
|------------------------|--------------------------------------------------------------------|
| <i>KIM-1</i>           | Forward: TCAGCTCGGGAATGCACAA<br>Reverse: TGGTGCCTTCCGTGTCTCT       |
| <i>Col1α1</i>          | Forward: ACATGTTTCAGCTTTGTGGACC<br>Reverse: TAGGCCATTGTGTATGCAGC   |
| <i>Fibronectin 1</i>   | Forward: GGAGTGGCACTGTCAACCTC<br>Reverse: ACTGGATGGGGTGGGAAT       |
| <i>iNos</i>            | Forward: GAGACAGGGAAGTCTGAAGCAC<br>Reverse: CCAGCAGTAGTTGCTCCTCTTC |
| <i>Il6</i>             | Forward: TGATGCACTTGCAGAAAACA<br>Reverse: ACCAGAGGAAATTTCAATAGGC   |
| <i>Tnfa</i>            | Forward: AGGGTCTGGGCCATAGAACT<br>Reverse: CCACCACGCTCTTCTGTCTAC    |
| <i>Arginase 1/Arg1</i> | Forward: AGAGATTATCGGAGCGCCTT<br>Reverse: TTTTCCAGCAGACCAGCTT      |
| <i>Fizz-1</i>          | Forward: CCCTTCTCATCTGCATCTCC<br>Reverse: CTGGATTGGCAAGAAGTTCC     |
| <i>Ho-1</i>            | Forward: GAAATCATCCCTTGCACGCC<br>Reverse : CCTGAGAGGTCACCCAGGTA    |
| <i>Nrf-1</i>           | Forward: GCACCTTTGGAGAATGTGGT<br>Reverse: GATAAATGCCCCGAAGCTGAG    |
| <i>Sod</i>             | Forward: CCAGTGCAGGACCTCATTTT<br>Reverse: GTTTACTGCGCAATCCCAAT     |
| <i>Cpt1</i>            | Forward: CTCCGCCTGAGCCATGAAG<br>Reverse: CACCAGTGATGATGCCATTCT     |
| <i>Pparg</i>           | Forward: GGAAGACCACTCGCATTCTT<br>Reverse: GTAATCAGCAACCATTGGGTCA   |
| <i>Pgc1b</i>           | Forward: TCCTGTAAAAGCCCGGAGTAT<br>Reverse: GCTCTGGTAGGGGCAGTGA     |
| <i>Glut1</i>           | Forward: GCCTGACCTTCGGATATGAGC<br>Reverse: TGCCATAGCAGTCAATGAGGA   |
| <i>Slc2a9/Glut9</i>    | Forward: CTGTCCAGATGTTGTCTAGG<br>Reverse: GTTATGATGCAGGAGCTTAGC    |
| <i>Drp1</i>            | Forward: GGGCACTTAAATTGGGCTCC<br>Reverse: TGTATTCTGTTGGCGTGGAAC    |
| <i>Fis1</i>            | Forward: GGCTGTCTCCAAGTCCAAATC<br>Reverse: GGAGAAAAGGGAAGGCGATG    |
| <i>Dnm1</i>            | Forward: GTGGACATGGTTATCTCGGAGC<br>Reverse: GGTGGTCACAATTCGCTCCATC |
| <i>Opa1</i>            | Forward: TCACCTCTGCGTTTATTTGAAGA<br>Reverse: GGGTAGAACGGGAGGAAAGG  |
| <i>Mfn1</i>            | Forward: TATCGATGCCTTGCGGAGAT<br>Reverse: GGCGAATCACAACACTTCCA     |
| <i>Mfn2</i>            | Forward: GGAGACCAACAAGGACTGGA<br>Reverse: TGCACAGTGACTTTCAACCG     |
| <i>18s</i>             | Forward: GCAATTATTCCCCATGAACG<br>Reverse: AGGGCCTCACTAAACCATCC     |

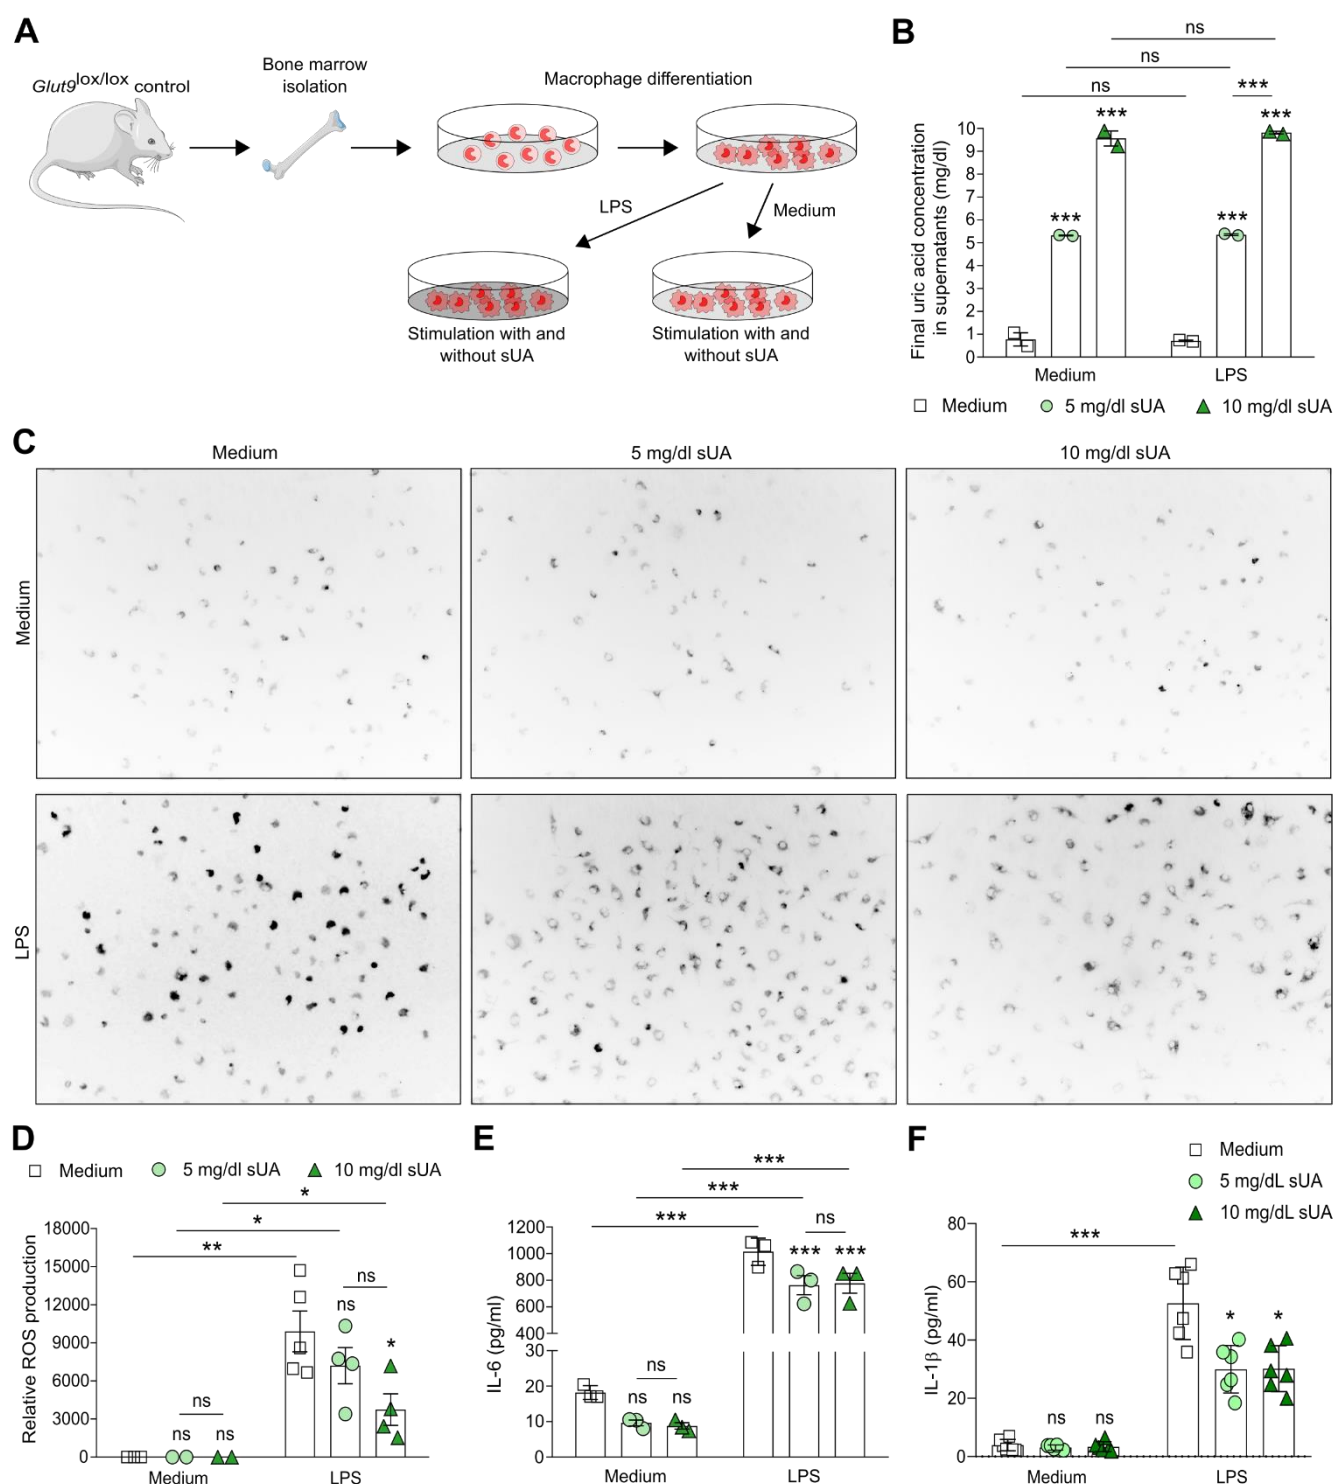

**Supplementary Figure S1.** Soluble uric acid inhibits the pro-inflammatory function of LPS-activated macrophages. **(A)** Schematic of experimental setup. Bone marrow-derived macrophages from *Glut9<sup>lox/lox</sup>* mice were primed with LPS for 24 h prior to sUA stimulation (medium; 5 mg/dL sUA; 10 mg/dL sUA). Afterwards, cells were stimulated with and without LPS (100 ng/mL) for 24 h. **(B)** Final UA concentrations after adding 5 and 10 mg/dL sUA into the macrophage culture were measured by colorimetric assay ( $n = 2$ ). **(C,D)** Representative images (C) and quantification of ROS production (D) was detected with dihydrorhodamine 123 dye using a fluorescent microscope ( $n = 2-5$ ). **(E)** Concentrations of interleukin (IL)-6 in culture supernatants were determined by ELISA ( $n = 3$ ). **(F)** Concentration of interleukin (IL)-1 $\beta$  in culture supernatants were determined by ELISA ( $n = 6$ ). Data are expressed as mean  $\pm$  SEM. \*  $p < 0.05$ , \*\*  $p < 0.01$ , \*\*\*  $p < 0.001$ , ns, not significant; two-way ANOVA with Tukey post-test.

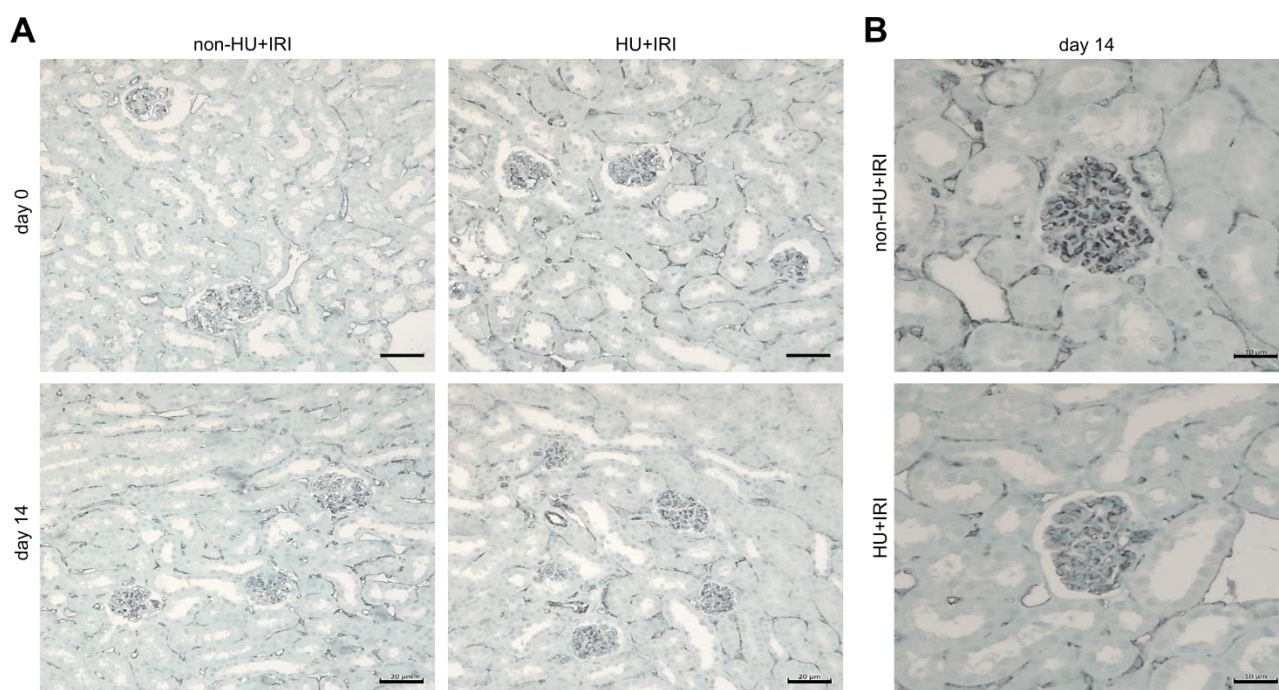

**Supplementary Figure S2.** Asymptomatic hyperuricemia does not induce endothelial dysfunction after acute organ injury. Hyperuricemic Alb-creERT2;*Glut9*<sup>lox/lox</sup> (HU) and *Glut9*<sup>lox/lox</sup> control (non-HU) mice were injected with tamoxifen and placed on a chow diet enriched with inosine to induce hyperuricemia (HU). Nephrectomy was performed (-day 7) prior to clamping of the left renal pedicle for 15 min to induce ischemia/reperfusion injury (IRI). Mice were sacrificed on day 14. (A,B) Representative images of CD31 staining of glomerular and peritubular endothelial cells on kidney sections in non-HU+IRI and HU+IRI mice on day 0 and 14. Magnification x200 (A) and x400 (B).

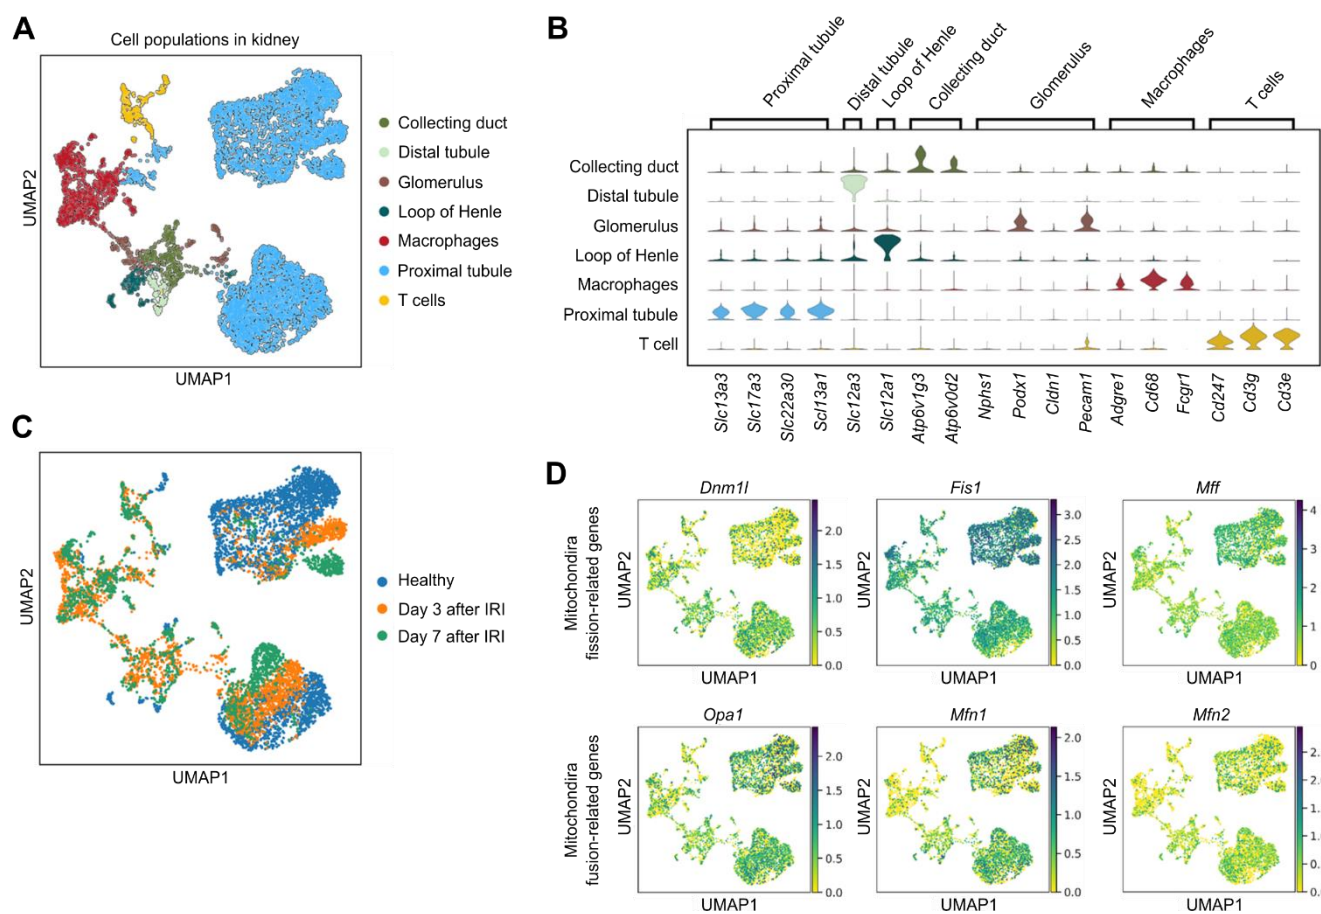

**Supplementary Figure S3.** Mitochondria gene expression profile of the kidney from mice after acute organ injury. Ischemia/reperfusion injury (IRI) was induced in wild-type C57Bl/6 mice by clamping the left renal pedicle for 30 min. Mice were sacrifice at 3 days (n = 3) and 7 days (n = 3) after IRI-induced AKI. Healthy mouse kidney (n = 1) was used as control. Single cell RNA sequencing of kidney samples was performed. (A) UMAP projection showing cluster distribution of mouse kidney cells. (B) Violin cluster characterization of cell population. (C) UMAP projection showing cluster distribution of mouse kidney cells in healthy mice and mice on day 3 and 7 after IRI-induced AKI. (D) UMAP projection showing cluster distribution of mitochondria fission- and fusion-related genes of mouse kidney cells.



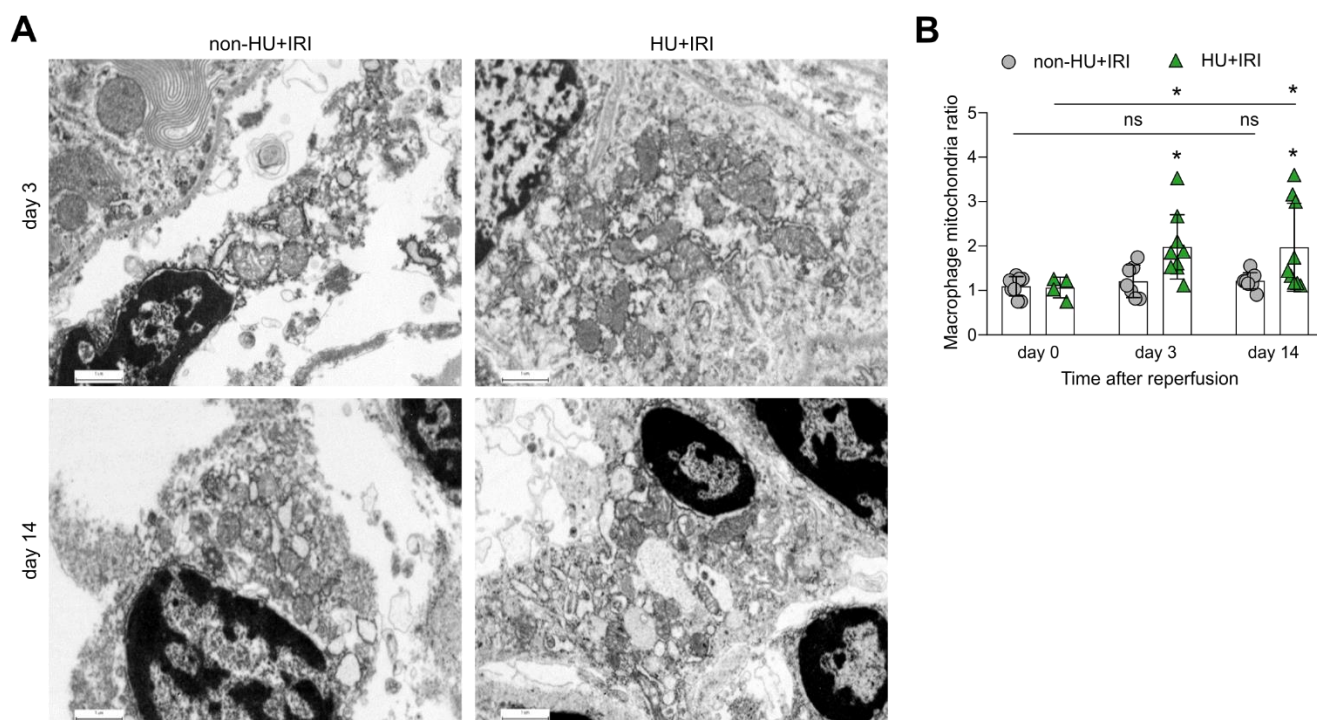

**Supplementary Figure S4.** Asymptomatic hyperuricemia promotes mitochondria elongation in macrophages after acute organ injury. Hyperuricemic Alb-creERT2;*Glut9*<sup>lox/lox</sup> (HU) and *Glut9*<sup>lox/lox</sup> control (non-HU) mice were injected with tamoxifen and placed on a chow diet enriched with inosine to induce hyperuricemia (HU). Nephrectomy was performed (day 7) prior to clamping of the left renal pedicle for 15 min to induce ischemia/reperfusion injury (IRI). Mice were sacrificed on day 3 or 14. (A,B) Electron microscopy of mitochondria morphology in macrophages (A) and quantification of the mitochondrial long axis/short axis ratio (n = 9–11 mitochondria, (B)). Data are mean ± SEM from 2–3 mice per group. \* p<0.05, ns, not significant; two-way ANOVA with Tukey's post-test.
